# Supplementary material for: Effect of TNF inhibitors on arterial stiffness and intima media thickness in rheumatoid arthritis: a systematic review and meta-analysis
Source: PubMed Central journal article supplement (PMC10017587; doi:10.1007/s10067-023-06505-y), 2023-01-16
Supplement: 10067_2023_6505_MOESM4_ESM.pdf [file 10067_2023_6505_MOESM4_ESM.pdf]

| Question                                                                                                                                                      | yes | no | partially | unclear | not applicable |
|---------------------------------------------------------------------------------------------------------------------------------------------------------------|-----|----|-----------|---------|----------------|
| Is the hypothesis/aim/objective of the study clearly described?                                                                                               | 1   | 0  | 0.5       | 0       | 0              |
| Are the main outcomes to be measured clearly described in the Introduction or Methods section?                                                                | 1   | 0  | 0.5       | 0       | 0              |
| Are the characteristics of the patients included in the study clearly described?                                                                              | 1   | 0  | 0.5       | 0       | 0              |
| Are the interventions of interest clearly described?                                                                                                          | 1   | 0  | 0.5       | 0       | 0              |
| Are the distributions of principal confounders in each group of subjects to be compared clearly described?                                                    | 1   | 0  | 0.5       | 0       | 0              |
| Are the main findings of the study clearly described?                                                                                                         | 1   | 0  | 0.5       | 0       | 0              |
| Does the study provide estimates of the random variability in the data for the main outcomes?                                                                 | 1   | 0  | 0.5       | 0       | 0              |
| Have the characteristics of patients lost to follow-up been described?                                                                                        | 1   | 0  | 0.5       | 0       | 1              |
| Have actual probability values been reported (e.g. 0.035 rather than <0.05) for the main outcomes except where the probability value is less than 0.001?      | 1   | 0  | 0.5       | 0       | 0              |
| Were the subjects asked to participate in the study representative of the entire population from which they were recruited?                                   | 1   | 0  | 0.5       | 0       | 0              |
| Were the staff, places, and facilities where the patients were treated, representative of the treatment the majority of patients receive?                     | 1   | 0  | 0.5       | 0       | 0              |
| Was an attempt made to blind study subjects to the intervention they have received ?                                                                          | 1   | 0  | 0.5       | 0       | 0              |
| Was an attempt made to blind those measuring the main outcomes of the intervention?                                                                           | 1   | 0  | 0.5       | 0       | 0              |
| If any of the results of the study were based on "data dredging", was this made clear?                                                                        | 1   | 0  | 0.5       | 0       | 1              |
| Is the time period between the intervention and outcome the same for all patients or do the analyses adjust for different lengths of follow-up of patients?   | 1   | 0  | 0.5       | 0       | 0              |
| Were the statistical tests used to assess the main outcomes appropriate?                                                                                      | 1   | 0  | 0.5       | 0       | 0              |
| Was compliance with the interventions reliable?                                                                                                               | 1   | 0  | 0.5       | 0       | 0              |
| Were the main outcome measures used accurate (valid and reliable)?                                                                                            | 1   | 0  | 0.5       | 0       | 0              |
| For studies with within-patient comparison, was the intervention comparable for the patients?                                                                 | 1   | 0  | 0.5       | 0       | 0              |
| For cohort studies and trials comparing different medications, were the patients in the different groups recruited from the same population?                  | 1   | 0  | 0.5       | 0       | 0              |
| Were patients recruited over the same period of time?                                                                                                         | 1   | 0  | 0.5       | 0       | 0              |
| Were losses of patients to follow-up taken into account?                                                                                                      | 1   | 0  | 0.5       | 0       | 1              |
| Did the study have sufficient power to detect a clinically important effect where the probability value for a difference being due to chance is less than 5%? | 1   | 0  | 0.5       | 0       | 0              |
